# Supplementary material for: Inhibitors of Polo-like kinase reveal roles in spindle-pole maintenance
Source: Springer Nature journal article supplement (doi:10.1038/nchembio825), 2006-10-08
Supplement: nchembio825-S2.pdf [file nchembio825-S2.pdf]

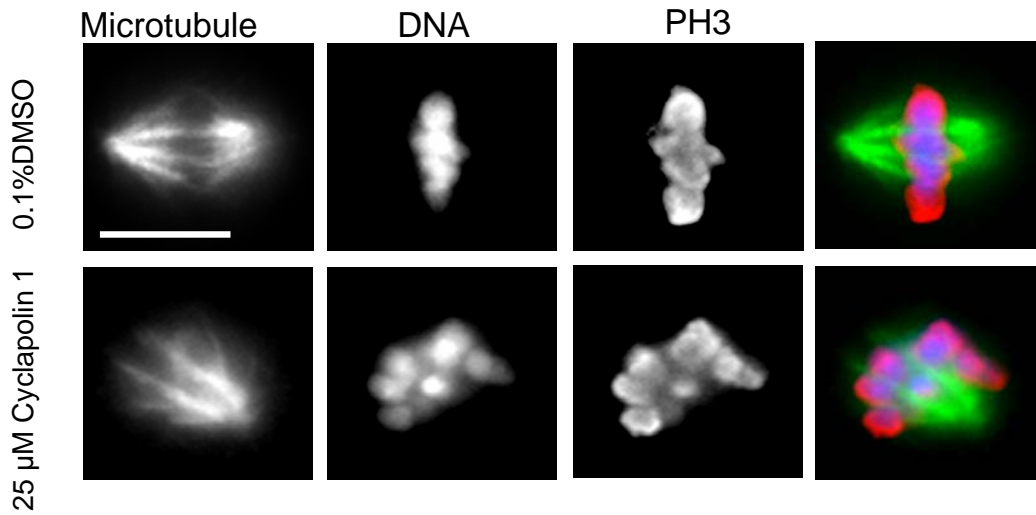

**Supplementary Figure 2. Cyclapolin-1 (Compound 1) does not affect phosphorylation of histone H3 on Serine 10** Control (a) or Compound 1 treated cells (b) (see legend to Fig. 4) were stained to reveal DNA (blue), microtubules (green) and phospho-histone H3 (red).
